# Supplementary material
Source: PubMed Central journal article supplement (PMC10929448)

**Table S1** Quantification of conjugated Hcp1 protein on the surface of VLPs under TEM. The number of total VLPs and VLPs-Hcp1 conjugation were counted for 20 fields under TEM and used to calculate the % conjugation.

| Field   | Number of Hcp1 on VLPs surface |      |     |     |     |     | Total Hcp1 | Total VLPs | % Conjugation |
|---------|--------------------------------|------|-----|-----|-----|-----|------------|------------|---------------|
|         | 0                              | 1    | 2   | 3   | 4   | 5   |            |            |               |
| 1       | 49                             | 8    | 4   | 5   | 2   | 4   | 23         | 95         | 24.2          |
| 2       | 64                             | 8    | 5   | 2   | 1   | 0   | 16         | 96         | 16.7          |
| 3       | 50                             | 6    | 8   | 2   | 1   | 0   | 17         | 84         | 20.2          |
| 4       | 50                             | 5    | 4   | 3   | 0   | 0   | 12         | 74         | 16.2          |
| 5       | 38                             | 12   | 6   | 3   | 1   | 1   | 23         | 84         | 27.4          |
| 6       | 33                             | 9    | 5   | 8   | 2   | 0   | 24         | 81         | 29.6          |
| 7       | 43                             | 6    | 6   | 2   | 2   | 1   | 17         | 77         | 22.1          |
| 8       | 38                             | 9    | 5   | 2   | 0   | 3   | 19         | 76         | 25.0          |
| 9       | 48                             | 15   | 6   | 2   | 2   | 0   | 25         | 98         | 25.5          |
| 10      | 35                             | 20   | 5   | 3   | 2   | 0   | 30         | 95         | 31.6          |
| 11      | 37                             | 20   | 9   | 3   | 1   | 0   | 33         | 103        | 32.0          |
| 12      | 52                             | 10   | 10  | 2   | 0   | 0   | 22         | 96         | 22.9          |
| 13      | 46                             | 10   | 5   | 0   | 0   | 0   | 15         | 76         | 19.7          |
| 14      | 46                             | 9    | 7   | 1   | 2   | 0   | 19         | 84         | 22.6          |
| 15      | 27                             | 10   | 8   | 3   | 5   | 0   | 26         | 79         | 32.9          |
| 16      | 46                             | 10   | 7   | 1   | 3   | 0   | 21         | 88         | 23.9          |
| 17      | 50                             | 9    | 3   | 4   | 2   | 0   | 18         | 86         | 20.9          |
| 18      | 46                             | 10   | 5   | 7   | 1   | 0   | 23         | 92         | 25.0          |
| 19      | 54                             | 8    | 3   | 3   | 1   | 1   | 16         | 86         | 18.6          |
| 20      | 49                             | 5    | 8   | 4   | 1   | 0   | 18         | 85         | 21.2          |
| Average | 45.1                           | 10.0 | 6.0 | 3.0 | 1.5 | 1.0 | 20.9       | 86.8       | 23.9          |

**Fig S1.** SDS-PAGE analysis of purified Hcp1 (19.54 kDa), VLPs capsid protein (47 kDa), chemical exposure of VLPs and conjugated Hcp1-VLPs in different concentrations. The proteins were visualized by running a 4-20% SDS-PAGE (Bio-Rad) and stained with Coomassie blue.

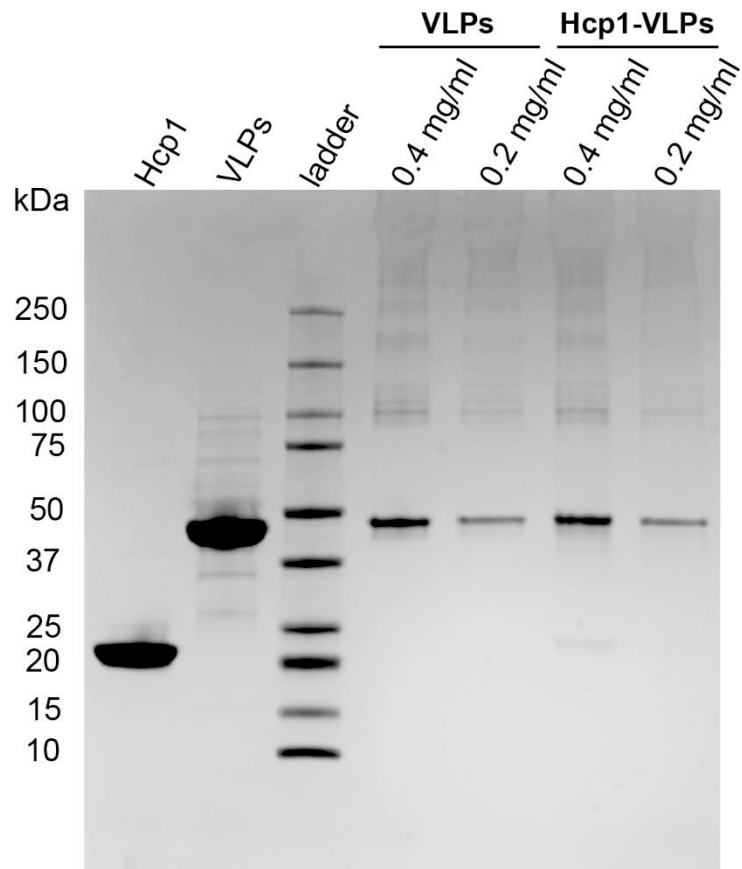

Supplement: iai.00019-24-s0001.pdf [file iai.00019-24-s0001.pdf]
